# Supplementary material
Source: PubMed Central journal article supplement (PMC5544016)

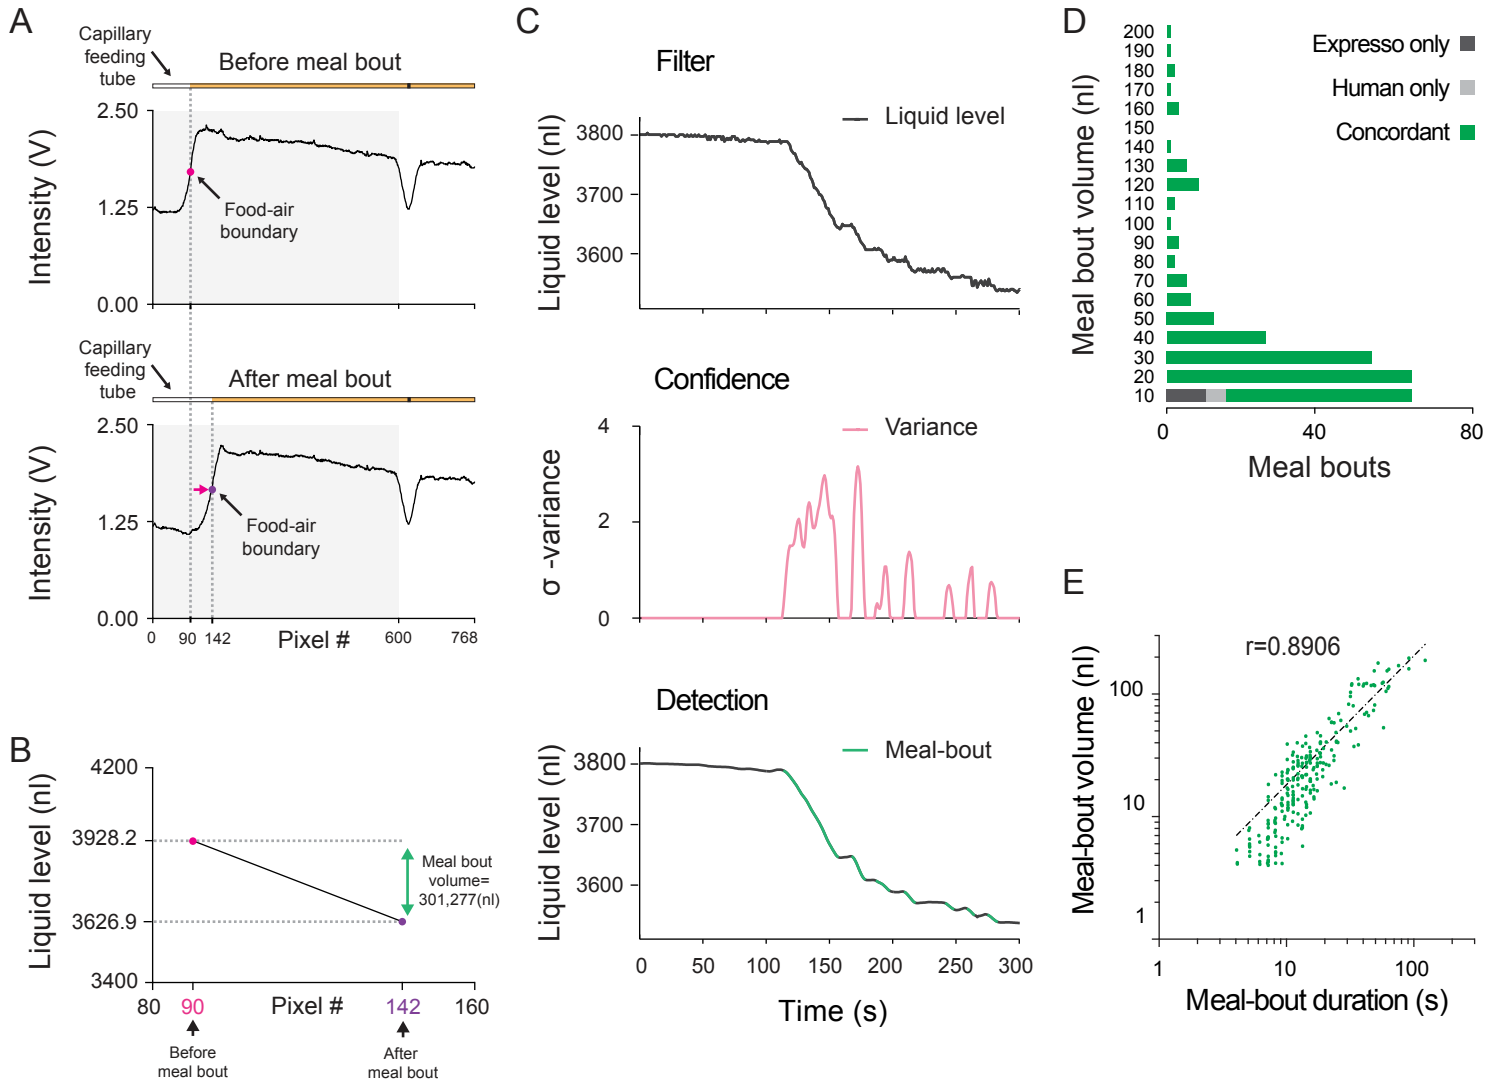

24 hr fasted, 330 mM sucrose + 5% yeast

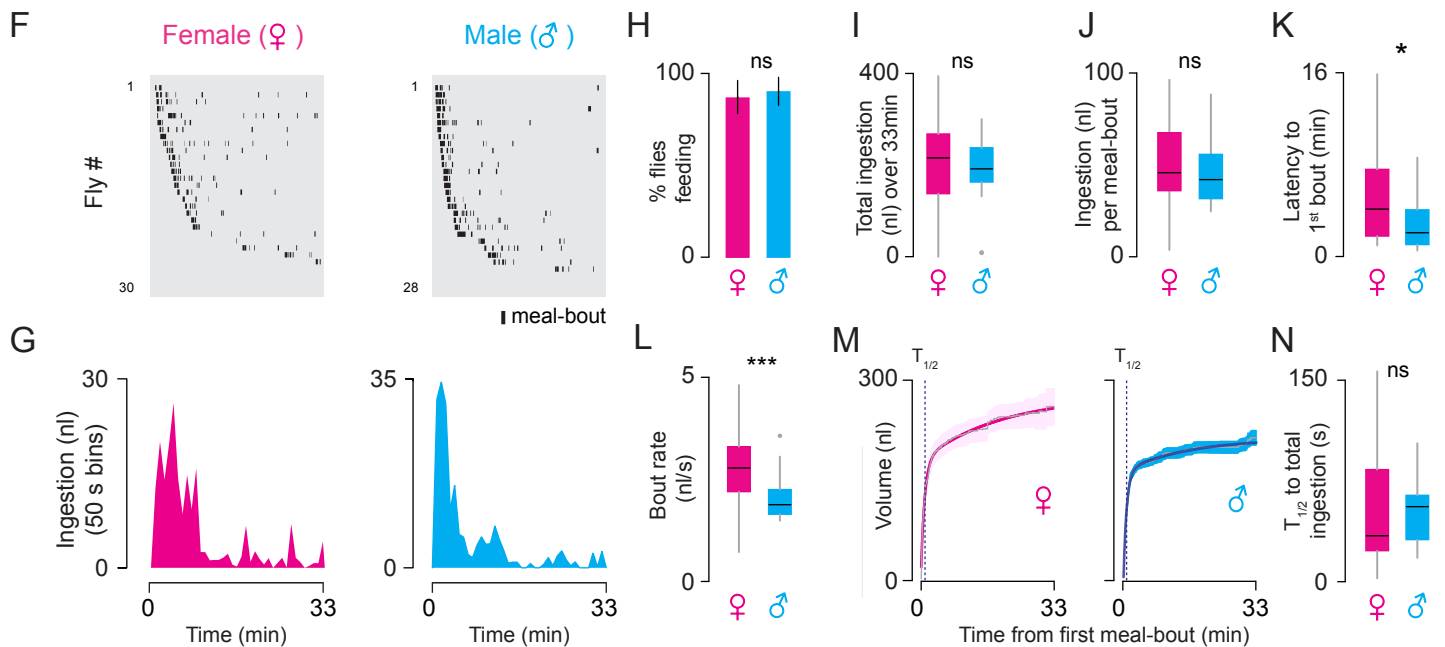

Supplement: NIHMS886777-supplement-3.pdf [file NIHMS886777-supplement-3.pdf]

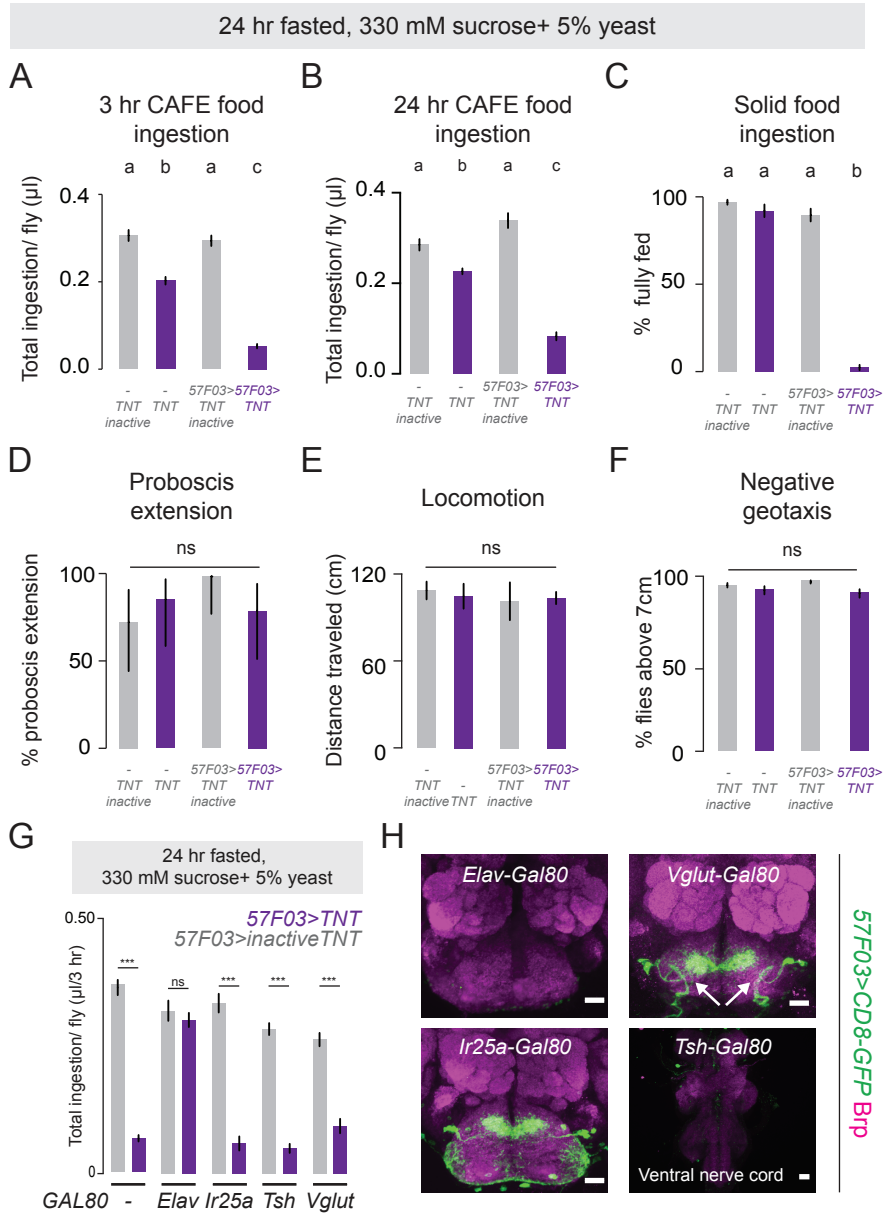

Supplement: NIHMS886777-supplement-4.pdf [file NIHMS886777-supplement-4.pdf]

*57F03>FLP; [stop]-CD8-GFP Brp*

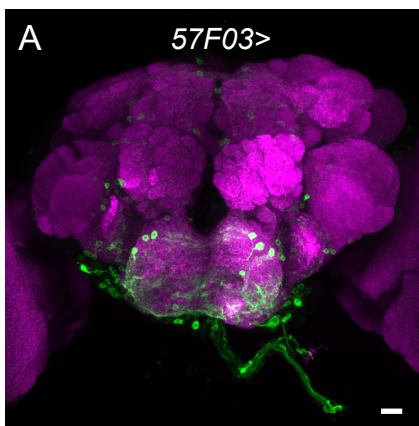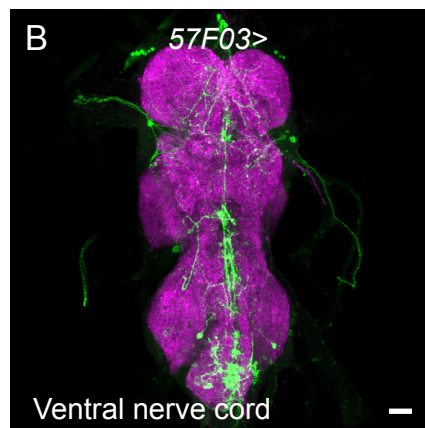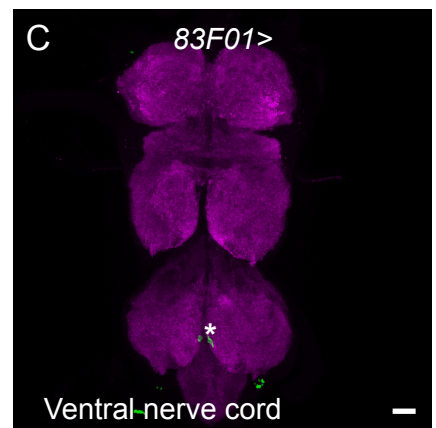

Supplement: NIHMS886777-supplement-5.pdf [file NIHMS886777-supplement-5.pdf]

*83F01>syf-GFP Brp*

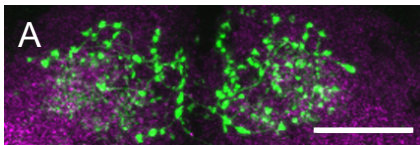

*83F01>Dscam-GFP, tdTomato*

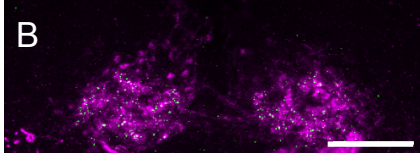

*83F01>CD8-GFP Brp*

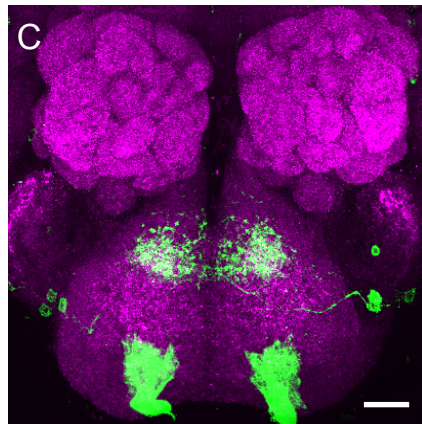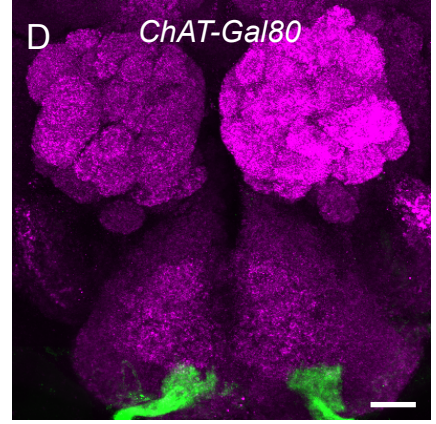

Supplement: NIHMS886777-supplement-6.pdf [file NIHMS886777-supplement-6.pdf]

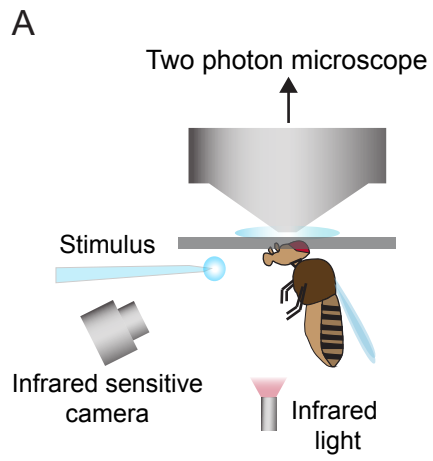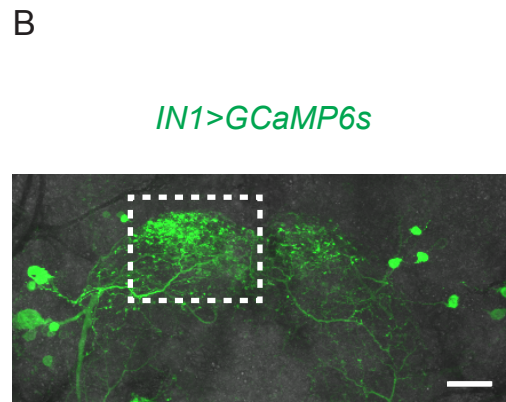

Supplement: NIHMS886777-supplement-7.pdf [file NIHMS886777-supplement-7.pdf]

*57F03-FLP-[mCherry]-ReaChR::Citrine Brp*

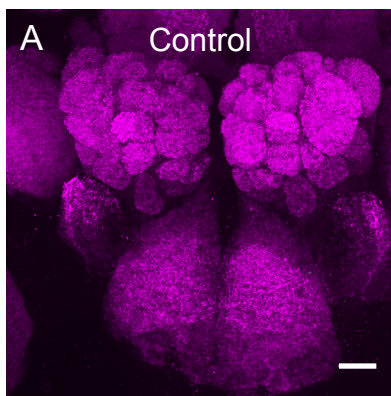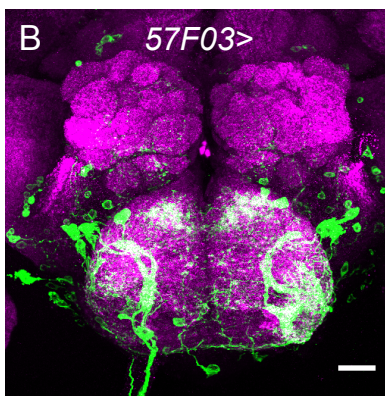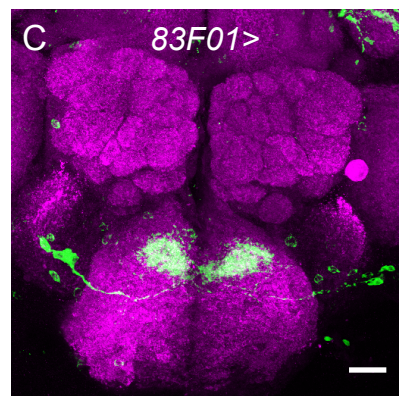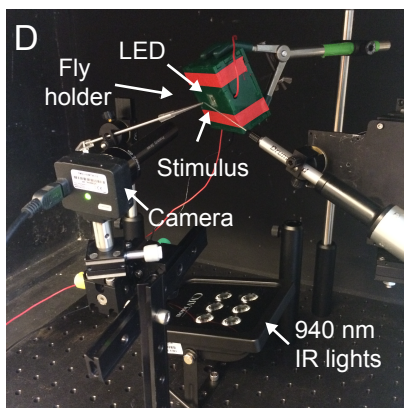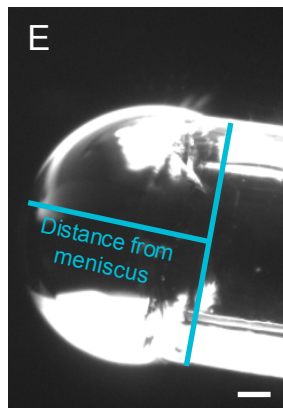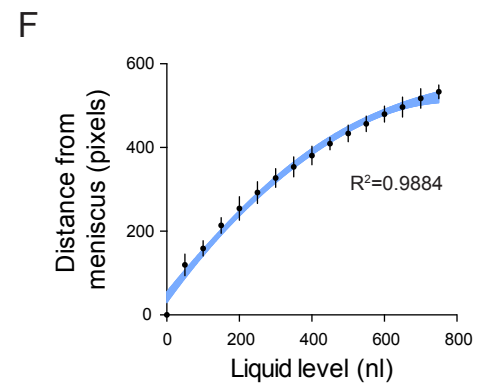

Supplement: NIHMS886777-supplement-8.pdf [file NIHMS886777-supplement-8.pdf]
